# Supplementary material for: Examination of overall treatment effect and the proportion attributable to contextual effect in osteoarthritis: meta-analysis of randomised controlled trials
Source: PubMed Central journal article supplement (PMC5099197; doi:10.1136/annrheumdis-2015-208387), 2016-02-16
Supplement: annrheumdis-2015-208387-s1.pdf [file annrheumdis-2015-208387-s1.pdf]

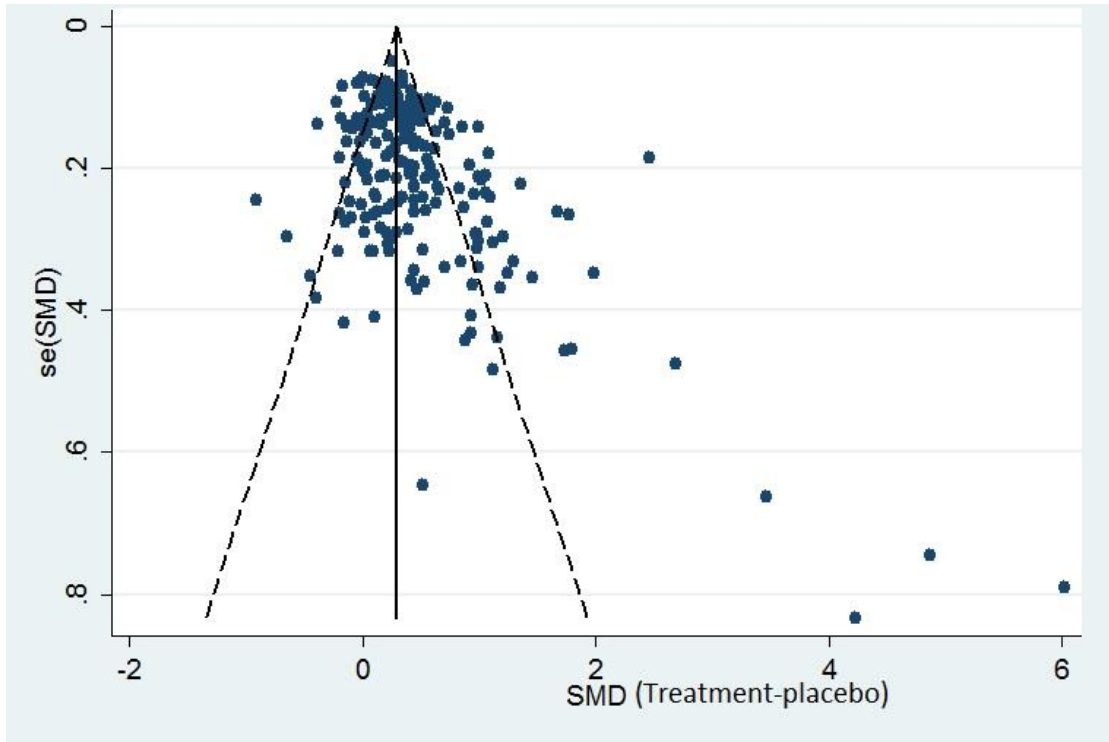

**Online supplementary Figure S1. Funnel plot of traditional effect size between treatment and placebo groups (Egger's test  $p < 0.001$ )**

**Online supplementary Table S1 Comparison between all trials and trials with sample size over 100 per arm for pain outcome**

| Outcome                 | Treatment               | PCE (95% Confidence interval) |                                            |                   |
|-------------------------|-------------------------|-------------------------------|--------------------------------------------|-------------------|
|                         |                         | All trials                    | Trials with sample size $\geq 100$ per arm |                   |
| Pain                    | <b>Oral</b>             |                               |                                            |                   |
|                         | Glucosamine             | 0.67(0.53, 0.84)              | 0.79 (0.61, 1.03)                          |                   |
|                         | Chondroitin             | 0.68(0.55, 0.84)              | 0.85 (0.68, 1.05)                          |                   |
|                         | NSAIDs                  | 0.70(0.65, 0.75)              | 0.72 (0.66, 0.78)                          |                   |
|                         | GS+CS                   | 0.76(0.62, 0.93)              | 0.79 (0.64, 0.98)                          |                   |
|                         | Paracetamol             | 0.87(0.73, 1.03)              | 0.85 (0.70, 1.03)                          |                   |
|                         | <b>Topical</b>          |                               |                                            |                   |
|                         | PEMF                    | 0.80(0.64, 0.99)              | -                                          |                   |
|                         | Topical NSAIDs          | 0.85(0.77, 0.93)              | 0.92 (0.85, 0.99)                          |                   |
|                         | <b>Needle/injection</b> |                               |                                            |                   |
|                         | IACS                    | 0.47(0.32, 0.70)              | -                                          |                   |
|                         | IAHA                    | 0.82(0.75, 0.90)              | 0.91 (0.82, 1.01)                          |                   |
|                         | Acupuncture             | 0.85(0.74, 0.97)              | 0.98 (0.86, 1.12)                          |                   |
|                         | <b>Surgical</b>         |                               |                                            |                   |
|                         | Lavage                  | 0.91(0.60, 1.37)              | -                                          |                   |
|                         | <b>Overall</b>          | 0.75 (0.72, 0.79)             | 0.81 (0.77, 0.85)                          |                   |
|                         | Function                | <b>Oral</b>                   |                                            |                   |
|                         |                         | NSAIDs                        | 0.64(0.59, 0.70)                           | 0.64 (0.58, 0.70) |
|                         |                         | Chondroitin                   | 0.63(0.47, 0.85)                           | 0.69 (0.40, 1.17) |
| Glucosamine             |                         | 0.64(0.49, 0.82)              | 0.67 (0.45, 0.96)                          |                   |
| GS+CS                   |                         | 0.85(0.71, 1.02)              | 0.85 (0.70, 1.03)                          |                   |
| Paracetamol             |                         | 0.92(0.78, 1.09)              | 0.90 (0.73, 1.11)                          |                   |
| <b>Topical</b>          |                         |                               |                                            |                   |
| PEMF                    |                         | 0.63(0.47, 0.84)              | -                                          |                   |
| Topical NSAIDs          |                         | 0.71(0.58, 0.87)              | 0.78 (0.60, 1.01)                          |                   |
| <b>Needle/injection</b> |                         |                               |                                            |                   |
| IACS                    |                         | 0.68(0.40, 1.18)              | -                                          |                   |
| IAHA                    |                         | 0.84(0.74, 0.96)              | 0.95 (0.83, 1.08)                          |                   |
| Acupuncture             |                         | 0.85(0.72, 1.00)              | 0.95 (0.83, 1.09)                          |                   |
| <b>Surgical</b>         |                         |                               |                                            |                   |
| Lavage                  |                         | 0.93(0.62, 1.40)              | -                                          |                   |
| <b>Overall</b>          |                         | 0.71(0.67, 0.75)              | 0.73 (0.68, 0.79)                          |                   |
| Stiffness               |                         | <b>Oral</b>                   |                                            |                   |
|                         |                         | NSAIDs                        | 0.73(0.67, 0.80)                           | 0.75 (0.69, 0.81) |
|                         |                         | Glucosamine                   | 0.82(0.63, 1.05)                           | 0.83 (0.62, 1.12) |
|                         | GS+CS                   | 0.91(0.72, 1.15)              | 0.91 (0.72, 1.15)                          |                   |
|                         | Paracetamol             | 0.95(0.72, 1.24)              | 0.94 (0.72, 1.24)                          |                   |
|                         | Chondroitin             | 1.00(0.77, 1.30)              | 1.00 (0.77, 1.30)                          |                   |

|                         |                         |                          |
|-------------------------|-------------------------|--------------------------|
| <b>Topical</b>          |                         |                          |
| PEMF                    | 0.71(0.43, 1.17)        |                          |
| Topical NSAIDs          | 0.93(0.84, 1.03)        | 0.95 (0.86, 1.05)        |
| <b>Needle/injection</b> |                         |                          |
| Acupuncture             | 0.79(0.66, 0.94)        | 0.82 (0.64, 1.04)        |
| IACS                    | 0.83(0.34, 2.04)        | -                        |
| IAHA                    | 0.88(0.77, 1.00)        | 0.88 (0.73, 1.06)        |
| <b>Surgical</b>         |                         |                          |
| Lavage                  | 1.00(0.46, 2.16)        | -                        |
| <b>Overall</b>          | <b>0.83(0.79, 0.87)</b> | <b>0.83 (0.79, 0.88)</b> |

PCE: proportion attributable to contextual effect; GS: glucosamine sulphate, CS: chondroitin sulphate, IACS: intra-articular corticosteroid, IAHA: intra-articular hyaluronic acid, PEMF: pulsed-electromagnetic field therapy, NSAIDs: non-steroidal anti-inflammatory drugs

**Online supplementary Table S2 Subgroup analyses of the proportion attributable to contextual effect in osteoarthritis**

| <b>Outcome</b>    | <b>Subgroups</b>                            | <b>No. of trials</b> | <b>No. of patients</b> | <b>PCE (95%CI)</b> | <b>I<sup>2</sup>%</b> |
|-------------------|---------------------------------------------|----------------------|------------------------|--------------------|-----------------------|
| <b>Pain</b>       | <b>Treatment administration</b>             |                      |                        |                    |                       |
|                   | Oral medication                             | 105                  | 26380                  | 0.70(0.66, 0.75)   | 54                    |
|                   | PEMF                                        | 18                   | 1005                   | 0.80(0.64, 0.99)   | 0                     |
|                   | Needle/injection                            | 61                   | 8031                   | 0.81(0.75, 0.88)   | 24                    |
|                   | Topical                                     | 20                   | 4405                   | 0.85(0.77, 0.93)   | 35                    |
|                   | Surgery                                     | 4                    | 434                    | 0.91(0.60, 1.37)   | 0                     |
|                   | <b>Duration of treatment</b>                |                      |                        |                    |                       |
|                   | ≤4 weeks                                    | 114                  | 17775                  | 0.74(0.69, 0.79)   | 35                    |
|                   | 4-8 weeks                                   | 76                   | 12807                  | 0.76(0.71, 0.83)   | 38                    |
|                   | 9-13 weeks                                  | 90                   | 20258                  | 0.80(0.76, 0.84)   | 23                    |
|                   | >13 weeks                                   | 52                   | 11221                  | 0.88(0.84, 0.93)   | 0                     |
|                   | <b>Chance of receiving active treatment</b> |                      |                        |                    |                       |
|                   | 33%                                         | 7                    | 1385                   | 0.92(0.78, 1.07)   | 0                     |
|                   | 50%                                         | 110                  | 14649                  | 0.75(0.70, 0.81)   | 40                    |
|                   | 60%                                         | 2                    | 624                    | 0.83(0.69, 0.98)   | 0                     |
|                   | 67%                                         | 60                   | 13925                  | 0.71(0.65, 0.77)   | 53                    |
|                   | 75%                                         | 19                   | 6141                   | 0.79(0.74, 0.85)   | 15                    |
|                   | 80%                                         | 8                    | 3262                   | 0.75(0.63, 0.90)   | 63                    |
|                   | 83%                                         | 2                    | 264                    | 0.68(0.33, 1.39)   | 77                    |
|                   | <b>Adequate allocation concealment</b>      |                      |                        |                    |                       |
|                   | No                                          | 113                  | 21292                  | 0.70(0.66, 0.75)   | 47                    |
|                   | Yes                                         | 95                   | 18951                  | 0.81(0.76, 0.85)   | 32                    |
|                   | <b>Blinding of participants</b>             |                      |                        |                    |                       |
|                   | No                                          | 15                   | 940                    | 0.62(0.48, 0.79)   | 37                    |
|                   | Yes                                         | 193                  | 39298                  | 0.76(0.73, 0.79)   | 42                    |
|                   | <b>Setting</b>                              |                      |                        |                    |                       |
|                   | Secondary care                              | 184                  | 34018                  | 0.74(0.71, 0.78)   | 40                    |
|                   | Primary care                                | 17                   | 4092                   | 0.79(0.67, 0.92)   | 59                    |
|                   | <b>Funding source</b>                       |                      |                        |                    |                       |
| Public            | 50                                          | 7942                 | 0.86 (0.79, 0.92)      | 9                  |                       |
| Industry          | 113                                         | 27782                | 0.77 (0.73, 0.81)      | 38                 |                       |
| Unclear           | 45                                          | 4525                 | 0.60 (0.52, 0.71)      | 57                 |                       |
| <b>Joint site</b> |                                             |                      |                        |                    |                       |
| Spine             | 5                                           | 379                  | 0.63 (0.44, 0.89)      | 0                  |                       |

|                 |                                             |     |       |                   |    |
|-----------------|---------------------------------------------|-----|-------|-------------------|----|
|                 | Hip                                         | 11  | 2228  | 0.66 (0.51, 0.85) | 26 |
|                 | Knee                                        | 147 | 29294 | 0.78 (0.74, 0.82) | 42 |
|                 | Hand                                        | 5   | 1036  | 0.82 (0.67, 1.01) | 22 |
|                 | Foot                                        | 3   | 243   | 0.96 (0.67, 1.38) | 0  |
|                 | TMJ                                         | 2   | 93    | 0.80 (0.16, 3.97) | 0  |
|                 | Mixed                                       | 35  | 6977  | 0.64 (0.57, 0.72) | 43 |
|                 | <b>Country</b>                              |     |       |                   |    |
|                 | Developing                                  | 11  | 950   | 0.49 (0.33, 0.72) | 80 |
|                 | Mixed                                       | 1   | 329   | 0.72 (0.53, 0.98) | /  |
|                 | Developed                                   | 196 | 38971 | 0.77 (0.74, 0.81) | 33 |
| <b>Function</b> | <b>Treatment administration</b>             |     |       |                   |    |
|                 | Oral                                        | 85  | 21811 | 0.67 (0.62, 0.73) | 60 |
|                 | PEMF                                        | 17  | 914   | 0.63 (0.47, 0.84) | 0  |
|                 | Topical                                     | 17  | 3717  | 0.71 (0.58, 0.87) | 81 |
|                 | Needle/injection                            | 43  | 6189  | 0.84 (0.77, 0.93) | 20 |
|                 | Surgery                                     | 4   | 425   | 0.93 (0.62, 1.40) | 0  |
|                 | <b>Duration of treatment</b>                |     |       |                   |    |
|                 | ≤4 weeks                                    | 80  | 13402 | 0.65(0.58, 0.72)  | 54 |
|                 | 4-8 weeks                                   | 56  | 9929  | 0.75(0.68, 0.83)  | 36 |
|                 | 9-13 weeks                                  | 69  | 16564 | 0.74(0.68, 0.81)  | 52 |
|                 | >13 weeks                                   | 47  | 4683  | 0.88(0.83, 0.95)  | 0  |
|                 | <b>Chance of receiving active treatment</b> |     |       |                   |    |
|                 | 33%                                         | 6   | 1244  | 0.82 (0.69, 0.98) | 0  |
|                 | 50%                                         | 92  | 12530 | 0.74 (0.67, 0.80) | 45 |
|                 | 60%                                         | 2   | 621   | 0.46 (0.20, 1.06) | 95 |
|                 | 67%                                         | 42  | 9713  | 0.68 (0.60, 0.76) | 61 |
|                 | 75%                                         | 15  | 5440  | 0.72 (0.66, 0.78) | 0  |
|                 | 80%                                         | 8   | 3311  | 0.70 (0.58, 0.86) | 56 |
|                 | 83%                                         | 1   | 192   | 0.49 (0.29, 0.82) | /  |
|                 | <b>Adequate allocation concealment</b>      |     |       |                   |    |
|                 | No                                          | 85  | 17187 | 0.67 (0.62, 0.73) | 54 |
|                 | Yes                                         | 81  | 15863 | 0.79 (0.73, 0.85) | 40 |
|                 | <b>Blinding of participants</b>             |     |       |                   |    |
|                 | No                                          | 11  | 732   | 0.58 (0.36, 0.92) | 61 |
|                 | Yes                                         | 155 | 32318 | 0.73 (0.69, 0.78) | 49 |
|                 | <b>Setting</b>                              |     |       |                   |    |
|                 | Secondary care                              | 148 | 28862 | 0.70 (0.65, 0.74) | 54 |
|                 | Primary care                                | 18  | 4200  | 0.78 (0.67, 0.92) | 59 |
|                 | <b>Funding source</b>                       |     |       |                   |    |

|                  |                                             |     |       |                   |    |
|------------------|---------------------------------------------|-----|-------|-------------------|----|
|                  | Public                                      | 42  | 7378  | 0.85 (0.78, 0.93) | 15 |
|                  | Industry                                    | 93  | 23271 | 0.68 (0.63, 0.73) | 63 |
|                  | Unclear                                     | 31  | 2420  | 0.63 (0.51, 0.78) | 49 |
|                  | <b>Joint site</b>                           |     |       |                   |    |
|                  | Spine                                       | 3   | 232   | 0.42 (0.19, 0.92) | 72 |
|                  | Hip                                         | 9   | 2091  | 0.54 (0.36, 0.81) | 58 |
|                  | Knee                                        | 124 | 25328 | 0.74 (0.69, 0.79) | 55 |
|                  | Hand                                        | 3   | 936   | 0.70 (0.55, 0.89) | 0  |
|                  | Foot                                        | 2   | 45    | 0.79 (0.35, 1.80) | 0  |
|                  | TMJ                                         | 2   | 93    | 0.84 (0.27, 2.65) | 0  |
|                  | Mixed                                       | 23  | 4339  | 0.59 (0.49, 0.70) | 56 |
|                  | <b>Country</b>                              |     |       |                   |    |
|                  | Developing                                  | 10  | 1000  | 0.86 (0.74, 1.01) | 0  |
|                  | Mixed                                       | 1   | 329   | 0.77 (0.54, 1.10) | /  |
|                  | Developed                                   | 155 | 31728 | 0.72 (0.68, 0.76) | 53 |
| <b>Stiffness</b> | <b>Treatment administration</b>             |     |       |                   |    |
|                  | Oral                                        | 45  | 12468 | 0.77 (0.71, 0.83) | 25 |
|                  | PEMF                                        | 6   | 378   | 0.71 (0.43, 1.17) | 0  |
|                  | Topical                                     | 10  | 2572  | 0.93 (0.84, 1.03) | 0  |
|                  | Needle/injection                            | 28  | 3811  | 0.84 (0.76, 0.94) | 0  |
|                  | Surgery                                     | 2   | 267   | 1.00 (0.46, 2.16) | 0  |
|                  | <b>Duration of treatment</b>                |     |       |                   |    |
|                  | ≤4 weeks                                    | 36  | 5430  | 0.80(0.72, 0.88)  | 0  |
|                  | 4-8 weeks                                   | 29  | 4729  | 0.71(0.60, 0.84)  | 47 |
|                  | 9-13 weeks                                  | 36  | 9507  | 0.82(0.77, 0.88)  | 0  |
|                  | >13 weeks                                   | 23  | 6156  | 0.90(0.83, 0.97)  | 0  |
|                  | <b>Chance of receiving active treatment</b> |     |       |                   |    |
|                  | 33%                                         | 3   | 482   | 0.73 (0.51, 1.05) | 20 |
|                  | 50%                                         | 50  | 7482  | 0.86 (0.81, 0.93) | 0  |
|                  | 60%                                         | 2   | 618   | 0.76 (0.61, 0.95) | 0  |
|                  | 67%                                         | 26  | 6307  | 0.76 (0.68, 0.85) | 27 |
|                  | 75%                                         | 7   | 2706  | 0.76 (0.66, 0.88) | 1  |
|                  | 80%                                         | 3   | 1896  | 0.94 (0.81, 1.08) | 0  |
|                  | <b>Adequate allocation concealment</b>      |     |       |                   |    |
|                  | No                                          | 47  | 8992  | 0.79 (0.74, 0.85) | 0  |
|                  | Yes                                         | 44  | 10493 | 0.85 (0.79, 0.91) | 16 |
|                  | <b>Blinding of participants</b>             |     |       |                   |    |
|                  | No                                          | 8   | 413   | 0.64 (0.42, 0.97) | 0  |
|                  | Yes                                         | 83  | 19083 | 0.83 (0.79, 0.87) | 1  |

|                       |    |       |                   |    |
|-----------------------|----|-------|-------------------|----|
| <b>Setting</b>        |    |       |                   |    |
| Secondary care        | 80 | 16864 | 0.81 (0.77, 0.86) | 0  |
| Primary care          | 11 | 2621  | 0.88 (0.80, 0.98) | 0  |
| <b>Funding source</b> |    |       |                   |    |
| Public                | 26 | 5045  | 0.87 (0.79, 0.95) | 0  |
| Industry              | 53 | 13672 | 0.81 (0.76, 0.87) | 13 |
| Unclear               | 12 | 774   | 0.65 (0.51, 0.83) | 4  |
| <b>Joint site</b>     |    |       |                   |    |
| Spine                 | /  |       |                   |    |
| Hip                   | 8  | 1953  | 0.71 (0.61, 0.83) | 0  |
| Knee                  | 67 | 14494 | 0.85 (0.80, 0.90) | 5  |
| Hand                  | 4  | 986   | 0.80 (0.63, 1.00) | 0  |
| Foot                  | 1  | 28    | 1.00 (0.52, 1.91) | /  |
| TMJ                   | /  |       |                   |    |
| Mixed                 | 11 | 2036  | 0.75 (0.64, 0.89) | 13 |
| <b>Country</b>        |    |       |                   |    |
| Developing            | 3  | 393   | 0.94 (0.72, 1.24) | 0  |
| Mixed                 | 1  | 329   | 0.82 (0.59, 1.14) | /  |
| Developed             | 87 | 18774 | 0.82 (0.78, 0.86) | 3  |

PCE= Proportional attributable to contextual effect; PEMF=Pulsed electromagnetic field therapy

**Online supplementary Table S3 Meta-regression analysis of the determinants of the proportion attributable to contextual effects for pain in osteoarthritis**

|                                                          | $\beta$ | (95% CI)        | p value |
|----------------------------------------------------------|---------|-----------------|---------|
| <b>Administration of treatment</b>                       |         |                 |         |
| Needle/injection vs. oral medication                     | 0.119   | (0.056 0.182)   | 0.000   |
| PEMF vs. oral medication                                 | 0.208   | (0.029 0.387)   | 0.023   |
| Surgery vs. oral medication                              | 0.249   | (-0.016 0.514)  | 0.066   |
| Topical vs. oral medication                              | 0.174   | (0.104 0.244)   | 0.000   |
| <b>Baseline pain (1-100)</b>                             | 0.002   | (-0.001 0.004)  | 0.150   |
| <b>Mean age, years</b>                                   | 0.000   | (-0.007 0.007)  | 0.937   |
| <b>Percentage of women, %</b>                            | -0.002  | (-0.004 0.000)  | 0.109   |
| <b>Duration of treatment, weeks</b>                      | 0.002   | (0.000 0.004)   | 0.021   |
| <b>Chance of receiving active treatment, %</b>           | 0.162   | (-0.067 0.391)  | 0.165   |
| <b>Sample size<math>\geq</math>100/arm ( yes vs. no)</b> | 0.177   | (0.121 0.232)   | 0.000   |
| <b>Adequate allocation concealment (yes vs. no)</b>      | 0.006   | (-0.038 0.049)  | 0.802   |
| <b>Adequate blinding of patients (yes vs. no)</b>        | 0.122   | (-0.027 0.271)  | 0.108   |
| <b>Funding source</b>                                    |         |                 |         |
| Industry vs. public                                      | -0.086  | (-0.155 -0.018) | 0.014   |
| Unclear vs. public                                       | -0.066  | (-0.166 0.035)  | 0.199   |
| <b>Cons</b>                                              | -0.558  | (-1.076 -0.039) | 0.035   |

PEMF= Pulsed electromagnetic field therapy



## Online supplementary - Search strategy in Medline (OVID)

The search terms of “osteoarthritis”, “randomised controlled trials” and each “treatment” were combined with “and” in literature search.

For osteoarthritis

- 1 osteoarthritis.mp. or exp osteoarthritis/
- 2 arthrosis.mp.
- 3 osteoarthr\$.mp.
- 4 (degenerative adj2 arthritis).mp.
- 5 gonarthrosis.mp.
- 6 coxarthrosis.mp.
- 7 1 or 2 or 3 or 4 or 5 or 6

For randomised controlled trial

- 1 randomized controlled trial.pt.
- 2 controlled clinical trial.pt.
- 3 randomized.ab.
- 4 placebo.ab.
- 5 clinical trials as topic.sh.
- 6 randomly.ab.
- 7 trial.ti.
- 8 1 or 2 or 3 or 4 or 5 or 6 or 7
- 9 (animals not (humans and animals)).sh.
- 10 8 not 9

For treatments

Acupuncture

- 1 exp Acupuncture Therapy/
- 2 acupunc\$.tw.
- 3 electroacupunc\$.tw.
- 4 meridian\$.tw.
- 5 acupoints\$.tw.
- 6 1 or 2 or 3 or 4 or 5

Pulsed electro-magnetic field therapy

- 1 Electromagnetic Field/
- 2 electromagnetic\$.tw.
- 3 exp Electric Stimulation Therapy/
- 4 (electric\$ adj3 stimulat\$).tw.
- 5 (short\$ adj3 wave&).tw.
- 6 or/1-5

Intra-articular injection of hyaluronic acid

- 1 viscosupplementation.mp. or exp Viscosupplementation/
- 2 hyaluronic acid.mp. or exp Hyaluronic Acid/
- 3 hyaluronan.mp.
- 4 hyaluronate.mp.
- 5 Hyalgan.mp.
- 6 Synvisc.mp.
- 7 Orthovisc.mp.
- 8 Artzal.mp.
- 9 Supartz.mp.
- 10 Suplasyn.mp.
- 11 BioHy.mp.
- 12 Euflexxa.mp.
- 13 Nuflexxa.mp.
- 14 Hylan GF-20.mp.
- 15 healonid.mp.
- 16 hylartil.mp.
- 17 hylartil.mp.
- 18 nrd 101.mp.
- 19 adant.mp.
- 20 or/1-20

#### Intra-articular injection of corticosteroid

- 1 exp Triamcinolone Acetonide/ or exp Triamcinolone/ or triamcinolone.mp.
- 2 exp Betamethasone/ or betamethasone.mp.
- 3 corticosteroid.mp. or exp Adrenal Cortex Hormones/
- 4 glucocorticoid.mp. or exp Glucocorticoids/
- 5 hydroxycorticosteroid.mp. or exp Hydroxycorticosteroids/
- 6 corticoid.mp.
- 7 exp Ketosteroids/ or ketosteroid.mp.
- 8 androstenedione.mp. or exp Androstenedione/
- 9 cortivazol.mp.
- 10 exp Methylprednisolone/ or methylprenisolone.mp.
- 11 injections, intra-articular.mp. or exp Injections, Intra-Articular/
- 12 intraarticular inject\$.tw.
- 13 intra-articular inject\$.tw.
- 14 or/1-10

#### Paracetamol

- 1 exp Acetaminophen/
- 2 ("Acetaminophen" or "paracetamol").mp.
- 3 1 or 2

#### Non-steroid anti-inflammatory drug

1 exp Anti-Inflammatory Agents, Non-Steroidal/  
2 NSAIDs.mp.  
3 cyclooxygenase.mp.  
4 cox\* inhibitor.mp.  
5 \*coxib/  
6 Lodine.mp.  
7 celecoxib.mp.  
8 Celebrex.mp.  
9 rofecoxib.mp.  
10 Vioxx.mp.  
11 meloxicam.mp.  
12 Mobic.mp.  
13 \*Naprosyn/  
14 Anaprox\*.mp.  
15 Naprapac Aleve.mp.  
16 (Cataflam or Voltaren or Arthrotec or Pennsaid).mp.  
17 lumiracoxib.mp.  
18 etoricoxib.mp.  
19 Motrin.mp.  
20 Profen.mp.  
21 Vicoprofen.mp.  
22 Combunox.mp.  
23 Advil.mp.  
24 Dolobid.mp.  
25 Nalfon.mp.  
26 Ansaid.mp.  
27 indometacin.mp.  
28 Indocin.mp.  
29 Indo-Lemmon.mp.  
30 Indomethagan.mp.  
31 Oruvail.mp.  
32 Toradol.mp.  
33 Mefenamic Acid.mp. or exp Mefenamic Acid/  
34 Ponstel.mp.  
35 Nabumetone.mp.  
36 Relafen.mp.  
37 Oxaprozin.mp.  
38 Daypro.mp.  
39 Piroxicam.mp. or exp Piroxicam/  
40 Feldene.mp.  
41 Sulindac.mp. or exp Sulindac/  
42 Clinoril.mp.  
43 Tolmetin.mp. or exp Tolmetin/

- 44 Tolectin.mp.
- 45 Valdecoxib.mp.
- 46 Bextra.mp.
- 47 Diacerein.mp.
- 48 Diacerhein.mp.
- 49 Rhein.mp.
- 50 Anthraquinones.mp. or exp Anthraquinones/
- 51 Diacetylrhein.mp.
- 52 ART 50.mp.
- 53 Cyclooxygenase Inhibitors.mp. or exp Cyclooxygenase Inhibitors/
- 54 exp Cyclooxygenase Inhibitors/ or exp Cyclooxygenase 2 Inhibitors/
- 55 exp Aspirin/ or Aspirin.mp.
- 56 Etodolac.mp. or exp Etodolac/
- 57 naproxen.mp. or exp Naproxen/
- 58 Diclofenac.mp. or exp Diclofenac/
- 59 Ibuprofen.mp. or exp Ibuprofen/
- 60 Diflunisal.mp. or exp Diflunisal/
- 61 Fenoprofen.mp. or exp Fenoprofen/
- 62 Flurbiprofen.mp. or exp Flurbiprofen/
- 63 Indomethacin.mp. or exp Indomethacin/
- 64 Ketoprofen.mp. or exp Ketoprofen/
- 65 exp Ketorolac/ or Ketorolac.mp.
- 66 or/1-65

#### Joint lavage

- 1 (arthroscop\$ adj40 debridement).tw.
- 2 (arthroscop\$ adj40 irrigation).tw.
- 3 (arthroscop\$ adj40 lavage).tw.
- 4 (arthroscop\$ adj40 washout).tw.
- 5 exp arthroscopy/ and (exp debridement/ or exp therapeutic Irrigation/)
- 6 (needle\$ adj40 debridement).tw.
- 7 (needle\$ adj40 irrigation).tw.
- 8 (needle\$ adj40 lavage).tw.
- 9 (needle\$ adj40 washout).tw.
- 10 1 or 2 or 3 or 4 or 5 or 6 or 7 or 8 or 9

#### Glucosamine

- 1. exp glucosamine/
- 2. glucosamine.rn, tw.
- 3. acetylglucosamine.tw, rn.
- 4. n-acetylglucosamine.tw.
- 5. n-acetyl-d-glucosamine.tw.
- 6. or/1-6

## Chondroitin

1. exp CHONDROITIN/
2. chondroitin.sh,rn,tw.
3. 1 or 2
